# Supplementary material
Source: PubMed Central journal article supplement (PMC3155157)
Supplement: mmc1.pdf [file mmc1.pdf]

The American Journal of Human Genetics, Volume 89

Supplemental Data

**Mutations in *ANKRD11* Cause KBG Syndrome,  
Characterized by Intellectual Disability,  
Skeletal Malformations, and Macrodonia**

Asli Sirmaci, Michail Spiliopoulos, Francesco Brancati, Eric Powell, Duygu Duman, Alex Abrams, Guney Bademci, Emanuele Agolini, Shengru Guo, Berrin Konuk, Asli Kavaz, Susan Blanton, Maria Christina Digilio, Bruno Dallapiccola, Juan Young, Stephan Zuchner, and Mustafa Tekin

**Table S1.** Phenotypic Features of All Study Subjects with KBG Syndrome

| KBG syndrome <sup>a</sup>                                   | Family 1 |         |         | 2-1    | 3-1    | 4-1     | 5-1    | 6-1     | 7-1      | 8-1     | 9-1    | 10-1   | Literature total<br>59 pts <sup>b</sup> (%) <sup>1-18</sup> |
|-------------------------------------------------------------|----------|---------|---------|--------|--------|---------|--------|---------|----------|---------|--------|--------|-------------------------------------------------------------|
|                                                             | II-1     | II-2    | I-1     |        |        |         |        |         |          |         |        |        |                                                             |
| Country                                                     | Turkey   | Turkey  | Turkey  | Turkey | Turkey | Italy   | Italy  | Italy   | Italy    | Italy   | Italy  | Italy  |                                                             |
| Familial <sup>c</sup> or Simplex (F/S)                      | F        | F       | F       | S      | S      | S       | S      | S       | S        | F       | F      | S      |                                                             |
| Sex (M/F)                                                   | M        | M       | M       | M      | M      | M       | M      | M       | M        | F       | M      | M      | 38/21                                                       |
| Age at diagnosis/current age                                | 16y/25y  | 13y/22y | 41y/46y | 9y/16y | 6y/11y | 14y/21y | 9y/17y | 14y/17y | 11y/31y  | 42y/49y | 9y/16y | 9y/16y |                                                             |
| Postnatal short stature <sup>e</sup>                        | +        | +       | +       | +      | -      | +       | +      | -       | -        | +       | -      | -      | 36/47 (77)                                                  |
| Developmental delay/ mental retardation <sup>d,e</sup>      | +        | +       | +       | +      | +      | +       | +      | +       | +        | mild    | mild   | Mild   | 55/59 (93)                                                  |
| <b>Craniofacial findings<sup>e</sup></b>                    |          |         |         |        |        |         |        |         |          |         |        |        |                                                             |
| Brachycephaly                                               | -        | -       | +       | +      | +      | +       | +      | -       | +        | -       | +      | +      | 29/40 (73)                                                  |
| Distinct shape of face (round or triangular)                | +        | +       | +       | +      | +      | +       | +      | +       | +        | -       | -      | +      | 39/50 (78)                                                  |
| Wide eyebrows/synophrys                                     | +        | +       | +       | +      | +      | -       | +      | +       | +        | -       | +      | +      | 30/50 (60)                                                  |
| Hypertelorism                                               | -        | +       | +       | -      | +      | +       | +      | +       | -        | -       | -      | +      | 22/40 (55)                                                  |
| Ptosis                                                      | +        | +       | +       | +      | -      | +       | +      | +       | +        | +       | -      | -      | 10/31 (32)                                                  |
| Anteverted nostrils                                         | +        | +       | +       | +      | +      | +       | +      | +       | -        | -       | +      | +      | 46/53 (87)                                                  |
| Prominent nasal bridge                                      | +        | +       | +       | -      | -      | +       | +      | +       | +        | +       | +      | +      | 51/58 (88)                                                  |
| <b>Dental findings</b>                                      |          |         |         |        |        |         |        |         |          |         |        |        |                                                             |
| Macrodonia of upper central permanent incisors <sup>*</sup> | +        | +       | +       | +      | +      | +       | +      | +       | +        | c       | +      | +      | 54/55 (98)                                                  |
| Oligodontia                                                 | -        | +       | -       | +      | +      | +       | -      | -       | -        | +       | -      | -      | 22/38 (58)                                                  |
| <b>Skeletal abnormalities<sup>e</sup></b>                   |          |         |         |        |        |         |        |         |          |         |        |        |                                                             |
| Abnormal vertebrae                                          | -        | +       | +       | NA     | -      | +       | -      | +       | +        | +       | -      | -      | 37/52 (71)                                                  |
| Cervical ribs                                               | +        | -       | -       | +      | -      | +       | -      | +       | -        | -       | -      | +      | 23/48 (48)                                                  |
| Short tubular bones of hands                                | +        | +       | +       | +      | NA     | +       | +      | +       | NA       | -       | +      | +      | 34/51 (67)                                                  |
| Delayed bone age <sup>e</sup>                               | +        | +       | NA      | +      | NA     | NA      | +      | -       | +        | NA      | +      | +      | 20/38 (53)                                                  |
| <b>Other Findings</b>                                       |          |         |         |        |        |         |        |         |          |         |        |        |                                                             |
| Abnormal EEG/seizures <sup>*d</sup>                         | +        | +       | -       | -      | NA     | -       | +      | -       | +        | +       | -      | -      | 10/20 (50)                                                  |
| Syndactyly of toes                                          | -        | -       | -       | +      | -      | +       | -      | -       | -        | +       | +      | -      | 24/45 (53)                                                  |
| 5th finger clinodactyly <sup>e</sup>                        | +        | +       | +       | +      | +      | +       | +      | +       | +        | -       | +      | +      | 29/45 (64)                                                  |
| Cryptorchidism                                              | +        | +       | +       | +      | +      | -       | +      | -       | +        | female  | -      | -      | 7/42 (17)                                                   |
| Other                                                       |          |         |         |        |        |         |        |         | AV canal |         |        |        |                                                             |
| <b>Patient meets at least 4 out of 8 criteria</b>           | +        | +       | +       | +      | +      | +       | +      | +       | +        | +       | +      | +      |                                                             |

a) Family 1 was reported by Tekin et al.<sup>1</sup>; Individuals 4-1, 8-1, and 9-1 were reported as patients 6, 2, and 3, respectively in Brancati et al.<sup>2</sup>; b) Numbers indicate patients with a specific finding among patients with published information on that finding. Please see supplementary reference list; c) premature loss of teeth, reported on interview; d) Included in the same criterion by Skjei et al.<sup>3</sup>; e) indicates criteria suggested by Skjei et al.<sup>3</sup>; NA: Not available.

**Table S2.** Next-Generation Sequencing Data

| <b>Statistics</b>                                 | <b>Family 2; 1</b> | <b>Family 1; I-1</b> | <b>Family 1; II-2</b> | <b>Average</b> |
|---------------------------------------------------|--------------------|----------------------|-----------------------|----------------|
| Reads Produced                                    | 148065148          | 138390074            | 121126160             | 135860461      |
| Mapped Reads                                      | 146928316          | 136900822            | 120331282             | 134720140      |
| Percent of Reads that were Mapped                 | 0.992322082        | 0.989238737          | 0.9934376             | 0.99166614     |
| Reads Mapped in Pairs                             | 146198265          | 134073799            | 117851544             | 132707869      |
| Percent of Mapped Reads that were Mapped in Pairs | 0.995031244        | 0.979349846          | 0.97939241            | 0.98459117     |
| Proportion of Target Covered 5x or Greater        | 0.965258           | 0.9459424            | 0.9467005             | 0.95263363     |
| Average Depth in Target                           | 130.4887           | 132.7724             | 114.1285              | 125.796533     |

**Table S3.** Results of Sanger Sequencing in 11 Genes Identified in Families 1 and 2 with Exome Sequencing

| Gene                                              | Genomic Position (hg19) | Base Change | Protein Change           | Family 1 (I-1 and II-2)                 | Genomic Position (hg19) | Base Change | Protein Change   | Family 2 (ind. 1)                 |
|---------------------------------------------------|-------------------------|-------------|--------------------------|-----------------------------------------|-------------------------|-------------|------------------|-----------------------------------|
| <i>MICALCL</i><br>NM_032867<br>NP_116256.2        | chr11:12316030          | G>A         | p.Arg351Gln              | Sanger confirmed/<br>co-segregating     | chr11:12315838          | A>G         | p.Asn287Ser      | Sanger confirmed /<br>not de novo |
| <i>CCDC88B</i><br>NM_032251<br>NP_115627.6        | chr11:64117106          | C>T         | p.Thr943Ile              | Sanger did not<br>confirm               | chr11:64112019          | G>A         | p.Gly669Asp      | NA                                |
| <i>FAM86C</i><br>NM_018172<br>NP_060642.2         | chr11:71510688          | A>T         | p.Ser165Cys              | Sanger confirmed /<br>co-segregating    | chr11:71507210          | T>C         | p.Tyr137His      | Sanger confirmed /<br>not de novo |
| <i>GNPAT</i><br>NM_014236<br>NP_055051.1          | chr1:231403487          | A>G         | p.Met373Val              | Sanger did not<br>confirm               | chr1:231401152          | A>G         | p.Lys228Glu      | NA                                |
| <i>FAM38A</i><br>NM_001142864.2<br>NP_001136336.2 | chr16:88782818          | C>T         | p.Ala2374Thr             | Sanger confirmed/<br>co-segregating     | chr16:88804361          | G>A         | p.Ala374Val      | Sanger confirmed /<br>not de novo |
| <i>ABCA7</i><br>NM_019112<br>NP_061985.2          | chr19:1053438           | G>A         | p.Gly1111Ser             | Sanger did not<br>confirm               | chr19:1051161           | G>A         | p.Val898Met      | NA                                |
|                                                   | chr19:1041871           | C>G         | p.Pro68Ala               | Sanger did not<br>confirm               |                         |             |                  |                                   |
| <i>PLSCR5</i><br>NM_001085420<br>NP_001078889.1   | chr3:146318211          | G>A         | p.Pro18Lys               | Sanger confirmed/<br>not co-segregating | chr3:146311775          | G>A         | p.Arg129X        | Sanger confirmed /<br>not de novo |
| <i>BSN</i><br>NM_003458<br>NP_003449.2            | chr3:49701910           | C>T         | p.Pro3888Lys             | Sanger confirmed/<br>co-segregating     | chr3:49694262           | C>T         | p.His2425Tyr     | Sanger did not<br>confirm         |
| <i>CWF19L2</i><br>NM_152434<br>NP_689647.2        | chr11:107299915         | C>A         | p.Arg194Ile              | Sanger confirmed/<br>not co-segregating | chr11:107219690         | delC        | p.Gly571GlefsX27 | Sanger confirmed /<br>not de novo |
| <i>HERC2</i><br>NM_004667<br>NP_004658.3          | chr15:28389352          | C>T         | p.Val3724Ile             | Sanger confirmed/<br>not co-segregating | chr15:28419619          | C>T         | p.Val3327Met     | Sanger did not<br>confirm         |
| <i>ANKRD11</i><br>NM_013275.4<br>NP_037407.4      | chr16:89341366          | C>G         | p.2524Glu_252<br>5Lysdel | Sanger confirmed/<br>co-segregating     | chr16:89350645          | delA        | p.Ser769GlnfsX8  | Sanger confirmed /<br>de novo     |

NA: Not available

**Table S4. ANKRD11 Primers Used in This Study**

| Primers                                | Forward Primer                  | Reverse Primer                     | PCR product size (bp) |
|----------------------------------------|---------------------------------|------------------------------------|-----------------------|
| ANKRD11 ex1                            | 5' CGCCTCTCTCCTTCACTCC 3'       | 5' GCTCCGGGACCCATTATT 3'           | 682                   |
| ANKRD11 ex2                            | 5' GGAGACGAGAGCGATGAAAG 3'      | 5' AACCTGGACTCAGCATT 3'            | 245                   |
| ANKRD11 ex3                            | 5' AGTCTGTTGAGTGCGGTGTG 3'      | 5' CCACCTCATCCCCATCTG 3'           | 285                   |
| ANKRD11 ex4                            | 5' CAAAATCTTGAGAGCTTGAGAATG 3'  | 5' AGTGCAAAGCCGAGGTG 3'            | 303                   |
| ANKRD11 ex5                            | 5' GGACCTAGCTTTGGAGGACAC 3'     | 5' CAGCACAGCCATGAGGC 3'            | 311                   |
| ANKRD11 ex6                            | 5' ATTGGACAAAGCAGGACCAC 3'      | 5' GAGGCTCAGGGCTCCAG 3'            | 318                   |
| ANKRD11 ex7                            | 5' CTCCAGAGACAGGAGGGAAG 3'      | 5' ACGGGGAAACAAAGCTACAG 3'         | 280                   |
| ANKRD11 ex8                            | 5' GGAACGGTAGAGGAGTTGTGC 3'     | 5' CACTGTGCAAACACCACAGG 3'         | 285                   |
| ANKRD11 ex9-1                          | 5' CTCCTCCTCTGCCATTCT 3'        | 5' TCGTGTCTTACTACCAGGCAAT 3'       | 500                   |
| ANKRD11 ex9-2                          | 5' AGACACGTCGGACGAGGA 3'        | 5' TCTCGTCCTTGTGGAGTCTG 3'         | 493                   |
| ANKRD11 ex9-3                          | 5' ACACAGACCAGCACACCAAG 3'      | 5' TCTCGGAAAGACCTGCTGAT 3'         | 589                   |
| ANKRD11 ex9-4                          | 5' CACGATCGCGACCACTTTA 3'       | 5' CGGAAGAAGGGCTCTCTGTA 3'         | 653                   |
| ANKRD11 ex9-5                          | 5' GAGACGGTGAAGGAGGACAG 3'      | 5' TGAGATGATCCCAGGGAAAG 3'         | 654                   |
| ANKRD11 ex9-6                          | 5' TCTCTCGACCAAGGGAAAGA 3'      | 5' TCAGAGGAGACCTCGCTGAT 3'         | 683                   |
| ANKRD11 ex9-7                          | 5' AGCCTGCTTGAAAAGTTGGA 3'      | 5' GCCTCTCCTTCTCGTCTCTC 3'         | 592                   |
| ANKRD11 ex9-8                          | 5' TGGATCTAGTGCCATCAACA 3'      | 5' GTGCCTCAGCTTCTCCATTT 3'         | 496                   |
| ANKRD11 ex9-9                          | 5' AGGACCTGGAGATCGAGGAG 3'      | 5' GCGGTAAAGGTTTGTGGAGA 3'         | 599                   |
| ANKRD11 ex9-10                         | 5' CCCTCCTTTTTTCGACAGGTT 3'     | 5' CTCGGAGGTGTCCAGGTC 3'           | 474                   |
| ANKRD11 ex9-11                         | 5' CAGAGGGCGTCTTCTCAAGT 3'      | 5' TCCGGAAGTGACTTGCAGTT 3'         | 586                   |
| ANKRD11 ex9-12                         | 5' AGGACGTCAAGGACGGAGT 3'       | 5' AGCTTCTAGAGCCACGTCCA 3'         | 554                   |
| ANKRD11 ex9-13                         | 5' TCATAAACGGTGGGGATGTT 3'      | 5' CTGAGGGATCTCCTCCACTC 3'         | 485                   |
| ANKRD11 ex9-14                         | 5' CCGAGGACGACACTGAGG 3'        | 5' GGACAAGACGGGCTGGAG 3'           | 692                   |
| ANKRD11 ex10-11                        | 5' CCCCGTGAATCCAGACTAT 3'       | 5' GAAGCTCCTGGTCAAAGTGC 3'         | 554                   |
| ANKRD11 ex12                           | 5' CTTCCNGTAGCGGTCTCTG 3'       | 5' GTTGTCACCACCATCACAG 3'          | 221                   |
| ANKRD11 ex13-1                         | 5' CCCATACCAGGGTAGGTTCA 3'      | 5' ACCAGTCTGGAAGGGATGG 3'          | 470                   |
| ANKRD11 ex13-2                         | 5' GGAGAGACCCCGAGAGAGAC 3'      | 5' AGGTCTGAAGCCCAGTCTGA 3'         | 420                   |
| ANKRD11 ex13-3                         | 5' CCAGCCGTGGTTCTGTTG 3'        | 5' TCCTGGGAGTAAGAAGGTCGT 3'        | 473                   |
| Family 2 exome conf.                   | 5' CAAACAAAGACATCAGCAGGTC 3'    | 5' TCGGACAAGTCAGAAAACCA 3'         | 370                   |
| Family 1 exome conf.                   | 5' CTGCGTCTACAGCACAGCAT 3'      | 5' CTCCTGGTCAAAGTGCAGAA 3'         | 400                   |
| Family 2 ARMS primers<br>(p.S769QfsX8) | 5' CAAACAAAGACATCAGCAGGTC 3'    | WT: 5' AATTTTGAGGGCCGGTCTTTTGA 3'  | 157                   |
|                                        |                                 | MUT: 5' AATTTTGAGGGCCGGTCTTTTGT 3' |                       |
| Family 3 ARMS primers<br>(p.Q2397X)    | WT: 5' TTTTCAGCGCTCCACCCAGC 3'  | 5' GGACAAGACGGGCTGGAG 3'           | 396                   |
|                                        | MUT: 5' TTTTCAGCGCTCCACCCAGT 3' |                                    |                       |
| Family 1 ARMS primers<br>(c.7570-1G>C) | 5' CTGCGTCTACAGCACAGCAT 3'      | WT: 5' CAGGATACGATCAGCTTCTCC 3'    | 182                   |
|                                        |                                 | MUT: 5' CAGGATACGATCAGCTTCTCG 3'   |                       |
| Family 6 ARMS primers<br>(p.P1837S)    | WT: 5' CAGGGCGCCCCTGCCCC 3'     | 5' CTCGGAGGTGTCCAGGTC 3'           | 253                   |
|                                        | MUT: 5' CAGGGCGCCCCTGCCCT 3'    |                                    |                       |
| RT PCR on human<br>brain cDNA          | 5'-TGGTGAACCTCCTGTTAGGC-3'      | 5'-CGTCGTCCTCATCAAACA-3'           | 210                   |

**Table S5.** Identified Variants in *ANKRD11* via Sanger Sequencing

| Family No | Exon  | Known Variants         | Novel Variants                           |                       |                                   |          |                   |           |
|-----------|-------|------------------------|------------------------------------------|-----------------------|-----------------------------------|----------|-------------------|-----------|
|           |       |                        | Nucleotide (NM_013275.4)                 | Protein (NP_037407.4) | Segregation                       | Controls | PolyPhen2         | SIFT      |
| 1         | 10-11 | -                      | c.7570-1G>C <sup>a</sup>                 | p.2524Glu_2525Lysdel  | Co-segregating                    | 0/339    | NA                | NA        |
| 2         | 9     | -                      | c.2305delT <sup>a</sup>                  | p.Ser769GlnfsX8       | De novo                           | 0/255    | NA                | NA        |
| 3         | 9     | rs2279348 <sup>a</sup> | c.7189C>T <sup>a</sup>                   | p.Gln2397X            | De novo                           | 0/336    | NA                | NA        |
| 4         | 9     | rs2279348 <sup>a</sup> | c.5953_5954delCA <sup>a</sup>            | p.Gln1985GlufsX46     | De novo                           | 0/40     | NA                | NA        |
| 5         | 9     | -                      | c.6071_6084delCGTACGCTCTGCC <sup>a</sup> | p.Pro2024ArgfsX3      | De novo                           | 0/40     | NA                | NA        |
| 6         | 9     | rs2279349 <sup>a</sup> | -                                        | -                     | -                                 | -        | -                 | -         |
|           | 9     | rs2279348 <sup>a</sup> | c.5509C>T <sup>a</sup>                   | p.Pro1837Ser          | Not studied                       | 2/300    | Possibly damaging | Tolerated |
| 7         | 9     | rs4785560 <sup>a</sup> | -                                        | -                     | -                                 | -        | -                 | -         |
|           | 9     | rs2279349 <sup>a</sup> | -                                        | -                     | -                                 | -        | -                 | -         |
| 8         | 9     | rs4785560 <sup>a</sup> | -                                        | -                     | -                                 | -        | -                 | -         |
|           | 9     | rs2279349 <sup>b</sup> | -                                        | -                     | -                                 | -        | -                 | -         |
|           | 9     | rs2279348 <sup>a</sup> | -                                        | -                     | -                                 | -        | -                 | -         |
| 9         | 9     | rs2279349 <sup>b</sup> | -                                        | -                     | -                                 | -        | -                 | -         |
|           | 9     | rs2279348 <sup>a</sup> | -                                        | -                     | -                                 | -        | -                 | -         |
| 10        | 9     | -                      | c.4683C>T <sup>a</sup>                   | p.Pro1561Ser          | Unaffected mother is heterozygous | 0/200    | Benign            | Tolerated |

a)Heterozygous; b)Homozygous; NA: Not applicable

**Figure S1.** Sanger Sequencing of Heterozygous c.2305delT Mutation in Patient 1 of Family 2 with Genomic DNA and Complementary DNA Shows Similar Peaks

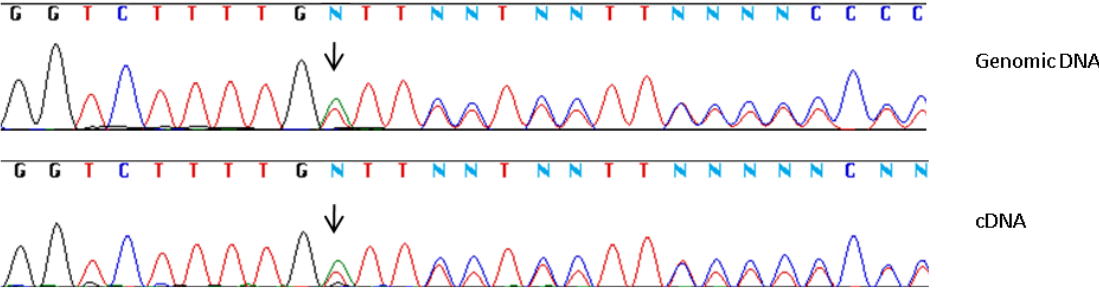

## Supplementary References

1. Tekin et al. (2004). The KBG syndrome: confirmation of autosomal dominant inheritance and further delineation of the phenotype. *Am. J. Med. Genet. A.* *130A*, 284–287.
2. Brancati, F., D'Avanzo, M.G., Digilio, M.C., Sarkozy, A., Biondi, M., De Brasi, D., Mingarelli, R., and Dallapiccola, B. (2004). KBG syndrome in a cohort of Italian patients. *Am. J. Med. Genet. A.* *131*, 144–149.
3. Skjei, K.L., Martin, M.M., and Slavotinek, A.M. (2007). KBG syndrome: report of twins, neurological characteristics, and delineation of diagnostic criteria. *Am. J. Med. Genet. A.* *143*, 292–300.
4. Davanzo, A.M., Rosalia, G., Biondi, M., De Brasi, D., Colucci, A.R., Panetta, A., Zaccagnino, P., Andreoli, G., and Roggini, M. (2005). Eight isolated cases of KBG syndrome: a new hypothesis of study. *Eur. Rev. Med. Pharmacol. Sci.* *9*, 49–52.
5. Devriendt, K., Holvoet, M., and Fryns, J.P. (1998). Further delineation of the KBG syndrome. *Genet. Couns.* *9*, 191–194.
6. Dowling, P.A., Fleming, P., Gorlin, R.J., King, M., Nevin, N.C., and McEntagart, M. (2001). The KBG syndrome, characteristic dental findings: a case report. *Int. J. Paediatr. Dent.* *11*, 131–134.
7. Fryns, J.P., and Haspeslagh, M. (1984). Mental retardation, short stature, minor skeletal anomalies, craniofacial dysmorphism and macrodontia in two sisters and their mother. Another variant example of the KBG syndrome? *Clin. Genet.* *26*, 69–72.
8. Hah, M., Lotspeich, L.J., Phillips, J.M., Torres, A.D., Cleveland, S.C., Hallmayer, J.F. (2009). Twins with KBG Syndrome and Autism. *J. Autism Dev. Disord.* *10.1007/s10803-009-0811-7*.
9. Herrmann, J., Pallister, P.D., Tiddy, W., and Opitz, J.M. (1975). The KBG syndrome—a syndrome of short stature, characteristic facies, mental retardation, macrodontia and skeletal anomalies. *Birth Defects Orig. Artic. Ser.* *11*, 7–18.
10. Kumar, H., Prabhu, N., and Cameron, A. (2009). KBG syndrome: review of the literature and findings of 5 affected patients. *Oral Surg. Oral Med. Oral Pathol. Oral Radiol. Endod.* *108*, e72–e79.
11. Mathieu, M., Helou, M., Morin, G., Dolhem, P., Devauchelle, B., and Piussan, C. (2000). The KBG syndrome: an additional sporadic case. *Genet. Couns.* *11*, 33–35.
12. Morghen, I., and Ferri, E. (2008). The KBG syndrome: Case report. *Cases J* *1*, 186.
13. Oegema, R., Schot, R., de Wit, M.C., Lequin, M.H., Oostenbrink, R., de Coo, I.F., and Mancini, G.M. (2010). KBG syndrome associated with periventricular nodular heterotopia. *Clin. Dysmorphol.* *19*, 164–165.



Parloir, C., Fryns, J.P., Deroover, J., Lebas, E., Goffaux, P., and van den Berghe, H. (1977). Short stature, craniofacial dysmorphism and dento-skeletal abnormalities in a large kindred. A variant of K.B.G. syndrome or a new mental retardation syndrome. *Clin. Genet.* 12, 263–266.

15. Rivera-Vega, M.R., Leyva Juárez, N., Cuevas-Covarrubias, S.A., and Kofman-Alfaro, S.H. (1996). Congenital heart defect and conductive hypoacusia in a patient with the KBG syndrome. *Clin. Genet.* 50, 278–279.

16. Maegawa, G.H.B., Leite, J.C.L., Félix, T.M., da Silveira, H.L.D., and da Silveira, H.E. (2004). Clinical variability in KBG syndrome: report of three unrelated families. *Am. J. Med. Genet. A.* 131, 150–154.

17. Smithson, S.F., Thompson, E.M., McKinnon, A.G., Smith, I.S., and Winter, R.M. (2000). The KBG syndrome. *Clin. Dysmorphol.* 9, 87–91.

18. Soekarman, D., Volcke, P., and Fryns, J.P. (1994). The KBG syndrome: follow-up data on three affected brothers. *Clin. Genet.* 46, 283–286.
